# Supplementary material for: Scalable fabrication of exceptional 3D carbon networks for supercapacitors
Source: Royal Society of Chemistry journal article supplement (doi:10.1039/c5ta03899e), 2015-01-01
Supplement: c5ta03899e1.pdf [file c5ta03899e1.pdf]

*Electronic Supplementary Information*

**Scalable fabrication of exceptional 3D carbon networks for supercapacitors**

Kuo Song,<sup>†</sup> Wei-Li Song,<sup>†</sup> Li-Zhen Fan,<sup>†,\*</sup>

*<sup>†</sup>Institute of Advanced Materials and Technology, University of Science and Technology Beijing,*

*Beijing, 100083, P. R. China.*

\* Corresponding Authors: Tel/Fax: +86 10 6233-4311

Email: [fanlizhen@ustb.edu.cn](mailto:fanlizhen@ustb.edu.cn) (Li-Zhen Fan)

Table S1. Price comparison of related materials/products of three methods to prepare 3D porous structure.

| Types           | Materials/Products                | Price (USD)      | Refs      |
|-----------------|-----------------------------------|------------------|-----------|
| Template method | SP <sup>a</sup> -AAO <sup>b</sup> | 150~240 (5 Pack) | 1         |
|                 | DP <sup>c</sup> -AAO              | 120~300 (5 Pack) |           |
|                 | V-Shape AAO                       | 225 (5 Pack)     |           |
|                 | Meso-Silica                       | 280 (5g)         |           |
|                 | TS-1                              | 280 (50g)        |           |
|                 | SBA-16                            | 380 (20g)        |           |
|                 | Y-Zeolite                         | 360 (100g)       |           |
| Chemical method | SWCNTs <sup>d</sup>               | 35~1050 (g)      | 2         |
|                 | DWCNTs <sup>e</sup>               | 350 (g)          | 3         |
|                 | MWCNTs <sup>f</sup>               | 110~150 (g)      | 3         |
|                 | FSWCNTs <sup>g</sup>              | 2800 (g)         | 4         |
|                 | FMWCNTs <sup>h</sup>              | 130~370 (g)      | 4         |
|                 | rGO                               | 200 (g)          | 2         |
|                 | PC <sup>i</sup>                   | 180 (50g)        | 1         |
|                 | GF <sup>j</sup>                   | 100 (1cmx1cm)    | 1         |
|                 | GN <sup>k</sup>                   | 720 (g)          | 4         |
| Physical method | Commercial Cotton                 | 5.46 (500g)      | this work |

**Note:** <sup>a</sup> Single Pass; <sup>b</sup> Anodic Aluminum Oxide Template; <sup>c</sup> Double Pass; <sup>d</sup> Single-walled carbon nanotubes; <sup>e</sup> Double-walled carbon nanotubes; <sup>f</sup> Multi-walled carbon nanotubes; <sup>g</sup> Functionalized single walled carbon nanotubes; <sup>h</sup> Functionalized multi-walled carbon nanotubes; <sup>i</sup> Porous carbon; <sup>j</sup> 3D graphene foam; <sup>k</sup> Graphene.



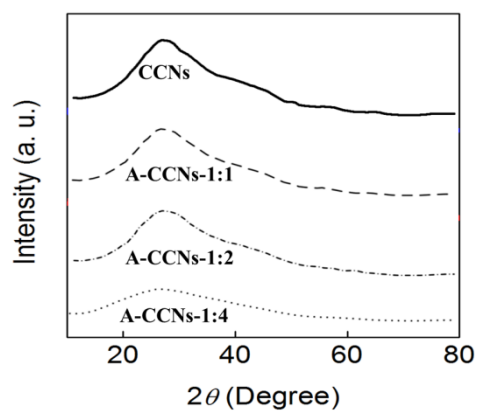

Figure S1. XRD patterns of CCNs, A-CCNs-1:1, A-CCNs-1:2, A-CCNs-1:4.

### References

1. <http://www.acsmaterial.com>
2. <http://www.carbonsolution.com>
3. <http://www.nano-lab.com>
4. <http://www.nanocs.com/nanotube.htm>
